# Supplementary material for: Coordination recognition of differential template units of lanthanide chiral chain
Source: Royal Society of Chemistry journal article supplement (doi:10.1039/d3dt04028c), 2024-01-01
Supplement: d3dt04028c1.pdf [file d3dt04028c1.pdf]

## Supporting Information

### **Coordination recognition of differential template units of lanthanide chiral chain**

Wen-Wen Qin,<sup>a,+</sup> Bing-Fan Long,<sup>a,+</sup> Zhong-Hong Zhu,<sup>a,\*</sup> Hai-Ling Wang,<sup>a</sup> Fu-Pei Liang,<sup>a,\*</sup> Hua-Hong Zou<sup>a,\*</sup>

<sup>a</sup>School of Chemistry and Pharmaceutical Sciences, State Key Laboratory for Chemistry and Molecular Engineering of Medicinal Resources, Guangxi Normal University, Guilin 541004, P. R. China

\*E-mail (Corresponding author): 18317725515@163.com (Z.-H. Zhu), liangfupei@glut.edu.cn (F.-P. Liang), gxnuchem@foxmail.com (H.-H. Zou).

<sup>+</sup>These authors contributed equally to this work.

**Keywords:** Lanthanide chiral chain; Coordination recognition; Precise synthesis; Magnetic properties

## Table of Contents:

| Supporting Tables  |                                                                                                                                                                                                                                                                                         |
|--------------------|-----------------------------------------------------------------------------------------------------------------------------------------------------------------------------------------------------------------------------------------------------------------------------------------|
| <b>Table S1</b>    | Crystallographic data of the <b>R-1</b> , <b>S-1</b> , <b>R-2</b> and <b>S-2</b> .                                                                                                                                                                                                      |
| <b>Table S2</b>    | Selected bond lengths (Å) and angles (°) of <b>R-1</b> .                                                                                                                                                                                                                                |
| <b>Table S3</b>    | Selected bond lengths (Å) and angles (°) of <b>S-1</b> .                                                                                                                                                                                                                                |
| <b>Table S4</b>    | Selected bond lengths (Å) and angles (°) of <b>R-2</b> .                                                                                                                                                                                                                                |
| <b>Table S5</b>    | Selected bond lengths (Å) and angles (°) of <b>S-2</b> .                                                                                                                                                                                                                                |
| <b>Table S6</b>    | <i>SHAPE</i> analysis of the Dy(III) in <b>R-1</b> .                                                                                                                                                                                                                                    |
| <b>Table S7</b>    | <i>SHAPE</i> analysis of the Dy(III) in <b>S-1</b> .                                                                                                                                                                                                                                    |
| <b>Table S8</b>    | <i>SHAPE</i> analysis of the Dy(III) in <b>R-2</b> .                                                                                                                                                                                                                                    |
| <b>Table S9</b>    | <i>SHAPE</i> analysis of the Dy(III) in <b>S-2</b> .                                                                                                                                                                                                                                    |
| Supporting Figures |                                                                                                                                                                                                                                                                                         |
| <b>Figure S1</b>   | Infrared spectra (IR) of <b>R-1</b> , <b>S-1</b> , <b>R-2</b> and <b>S-2</b> (a, b).                                                                                                                                                                                                    |
| <b>Figure S2</b>   | Powder diffraction pattern (PXRD) of <b>R-1</b> , <b>S-1</b> , <b>R-2</b> and <b>S-2</b> (a–d).                                                                                                                                                                                         |
| <b>Figure S3</b>   | TG curve of <b>R-1</b> , <b>S-1</b> , <b>R-2</b> and <b>S-2</b> (a), DSC curve of <b>R-1</b> , <b>S-1</b> , <b>R-2</b> and <b>S-2</b> (b).                                                                                                                                              |
| <b>Figure S4</b>   | Temperature dependence of $\chi_m T$ for <b>S-1</b> (a) and <b>S-2</b> (c); <i>M</i> vs. <i>H/T</i> plots of <b>S-1</b> (b) and <b>S-2</b> (d).                                                                                                                                         |
| <b>Figure S5</b>   | Loop curve graph of <b>R-1</b> (a), <b>S-1</b> (b), <b>R-2</b> (c) and <b>S-2</b> (d) at 2 K.                                                                                                                                                                                           |
| <b>Figure S6</b>   | Temperature-dependent $\chi'$ and $\chi''$ AC susceptibilities under 0 Oe DC fields for <b>R-1</b> , <b>S-1</b> , <b>R-2</b> and <b>S-2</b> (a-d).                                                                                                                                      |
| <b>Figure S7</b>   | Frequency-dependence of the in-of-phase ( $\chi'$ ) and the out-of-phase ( $\chi''$ ) components under 0 Oe DC fields for <b>R-1</b> , <b>S-1</b> , <b>R-2</b> and <b>S-2</b> (a–h).                                                                                                    |
| <b>Figure S8</b>   | Temperature-dependent $\chi'$ and $\chi''$ AC susceptibilities under 1200 Oe DC fields for <b>R-1</b> (a), 800 Oe DC fields for <b>S-1</b> (b), 1000 Oe DC fields for <b>R-2</b> (c) and 800 Oe DC fields for <b>S-2</b> (d).                                                           |
| <b>Figure S9</b>   | Frequency-dependence of the in-of-phase ( $\chi'$ ) and the out-of-phase ( $\chi''$ ) components under 1200 Oe DC fields for <b>R-1</b> (a and b), 800 Oe DC fields for <b>S-1</b> (c and d), 1000 Oe DC fields for <b>R-2</b> (e and f) and 800 Oe DC fields for <b>S-2</b> (g and h). |

## Materials and Measurements.

All chemicals and solvents were analytical grade and were used without further purification. The infrared spectra were carried out on a Pekin-Elmer Two spectrophotometer with pressed KBr pellets. The elemental analyses were determined on a Perkin-Elmer model 240 °C elemental analyzer. The powder X-ray diffraction (PXRD) spectra were measured on a Rigaku D/Max-3c diffractometer with Cu  $K\alpha$  radiation ( $\lambda = 1.5418 \text{ \AA}$ ). Thermogravimetric analyses were performed on a PerkinElmer Pyris Diamond TG-DTA instrument under an  $N_2$  atmosphere using a heating rate of  $5 \text{ }^\circ\text{C min}^{-1}$  from room temperature up to  $1000 \text{ }^\circ\text{C}$ . The circular dichroism (CD) spectra were recorded on a JASCO J-1500 spectropolarimeter at room temperature. Magnetic properties were performed on a Superconducting Quantum Interference Device (SQUID) magnetometer. The diamagnetism of all constituent atoms was corrected with Pascal's constant.

## X-ray crystallography.

Single-crystal X-ray diffraction (SCXRD) data were collected on a ROD, Synergy Custom DW system, HyPix diffractometer (Cu- $K\alpha$  radiation and  $\lambda = 1.54184 \text{ \AA}$ ) in  $\Phi$  and  $\omega$  scan modes. The structures were solved by direct methods, and refined by a full-matrix least-squares method on the basis of  $F^2$  by using SHELXL and OLEX2.<sup>[1]</sup> Anisotropic thermal parameters were applied to all non-hydrogen atoms. Hydrogen atoms were generated geometrically. The crystallographic data for the **R-1**, **S-1**, **R-2** and **S-2** are listed in Table S1, and selected bond lengths and angles are given in Table S2–S5. The CCDC reference numbers for the crystal structures of **R-1**, **R-2**, **S-1** and **S-2** are 2306659, 2306660, 2306784, 2306664, respectively.

[1] Sheldrick, G. M. *Acta Crystallogr., Sect. C: Struct. Chem.* **2015**, *71*, 3–8.

**Table S1.** Crystallographic data of the **R-1**, **S-1**, **R-2** and **S-2**.

|                                                                 | <b>R-1</b>                                                                                     | <b>S-1</b>                                                                                     | <b>R-2</b>                                                                                     | <b>S-2</b>                                                                                     |
|-----------------------------------------------------------------|------------------------------------------------------------------------------------------------|------------------------------------------------------------------------------------------------|------------------------------------------------------------------------------------------------|------------------------------------------------------------------------------------------------|
| Formula                                                         | C <sub>33</sub> H <sub>53</sub> Cl <sub>4</sub> Dy <sub>2</sub> N <sub>7</sub> O <sub>15</sub> | C <sub>33</sub> H <sub>54</sub> Cl <sub>4</sub> Dy <sub>2</sub> N <sub>6</sub> O <sub>15</sub> | C <sub>30</sub> H <sub>43</sub> Cl <sub>4</sub> Dy <sub>2</sub> N <sub>6</sub> O <sub>13</sub> | C <sub>31</sub> H <sub>45</sub> Cl <sub>4</sub> Dy <sub>2</sub> N <sub>6</sub> O <sub>13</sub> |
| Formula weight                                                  | 1254.62                                                                                        | 1241.62                                                                                        | 1162.50                                                                                        | 1176.53                                                                                        |
| <i>T</i> , K                                                    | 100.00(10)                                                                                     | 100.00(10)                                                                                     | 100.00(10)                                                                                     | 100.00(10)                                                                                     |
| Crystal system                                                  | orthorhombic                                                                                   | orthorhombic                                                                                   | orthorhombic                                                                                   | orthorhombic                                                                                   |
| Space group                                                     | <i>P</i> 2 <sub>1</sub> 2 <sub>1</sub> 2 <sub>1</sub>                                          |
| <i>a</i> , Å                                                    | 13.47190(10)                                                                                   | 13.47640(10)                                                                                   | 13.06030(10)                                                                                   | 13.07500(10)                                                                                   |
| <i>b</i> , Å                                                    | 14.86600(10)                                                                                   | 14.86660(10)                                                                                   | 17.6285(2)                                                                                     | 17.6728(2)                                                                                     |
| <i>c</i> , Å                                                    | 24.0640(2)                                                                                     | 24.0565(2)                                                                                     | 17.9734(2)                                                                                     | 18.0533(2)                                                                                     |
| <i>α</i> , °                                                    | 90                                                                                             | 90                                                                                             | 90                                                                                             | 90                                                                                             |
| <i>β</i> , °                                                    | 90                                                                                             | 90                                                                                             | 90                                                                                             | 90                                                                                             |
| <i>γ</i> , °                                                    | 90                                                                                             | 90                                                                                             | 90                                                                                             | 90                                                                                             |
| <i>V</i> , Å <sup>3</sup>                                       | 4819.38(6)                                                                                     | 4819.68(6)                                                                                     | 4138.08(7)                                                                                     | 4171.61(7)                                                                                     |
| <i>Z</i>                                                        | 4                                                                                              | 4                                                                                              | 4                                                                                              | 4                                                                                              |
| <i>D</i> <sub>c</sub> , g cm <sup>-3</sup>                      | 1.729                                                                                          | 1.711                                                                                          | 1.866                                                                                          | 1.873                                                                                          |
| <i>μ</i> , mm <sup>-1</sup>                                     | 19.018                                                                                         | 19.002                                                                                         | 22.046                                                                                         | 21.880                                                                                         |
| <i>F</i> (000)                                                  | 2480.0                                                                                         | 2456.0                                                                                         | 2276.0                                                                                         | 2308.0                                                                                         |
| 2θ range for data collection/°                                  | 6.992 to 151.706                                                                               | 6.99 to 151.672                                                                                | 7.024 to 133.202                                                                               | 7 to 133.168                                                                                   |
| Reflns coll.                                                    | 32105                                                                                          | 32245                                                                                          | 26441                                                                                          | 26211                                                                                          |
| Unique reflns                                                   | 9709                                                                                           | 9704                                                                                           | 7307                                                                                           | 7375                                                                                           |
| <i>R</i> <sub>int</sub>                                         | 0.0449                                                                                         | 0.0431                                                                                         | 0.0516                                                                                         | 0.0534                                                                                         |
| <i>R</i> <sub>1</sub> <sup>a</sup> ( <i>I</i> > 2σ( <i>I</i> )) | 0.0451                                                                                         | 0.0431                                                                                         | 0.0403                                                                                         | 0.0390                                                                                         |
| <i>wR</i> <sub>2</sub> <sup>b</sup> (all data)                  | 0.1248                                                                                         | 0.1138                                                                                         | 0.1046                                                                                         | 0.1004                                                                                         |
| GOF                                                             | 1.092                                                                                          | 1.115                                                                                          | 1.045                                                                                          | 1.030                                                                                          |
| Flack parameter                                                 | 0.016(3)                                                                                       | 0.011(2)                                                                                       | 0.008(3)                                                                                       | 0.003(3)                                                                                       |

$$^aR_1 = \frac{\sum ||F_o| - |F_c||}{\sum |F_o|}, \quad ^b wR_2 = [\frac{\sum w(F_o^2 - F_c^2)^2}{\sum w(F_o^2)^2}]^{1/2}$$

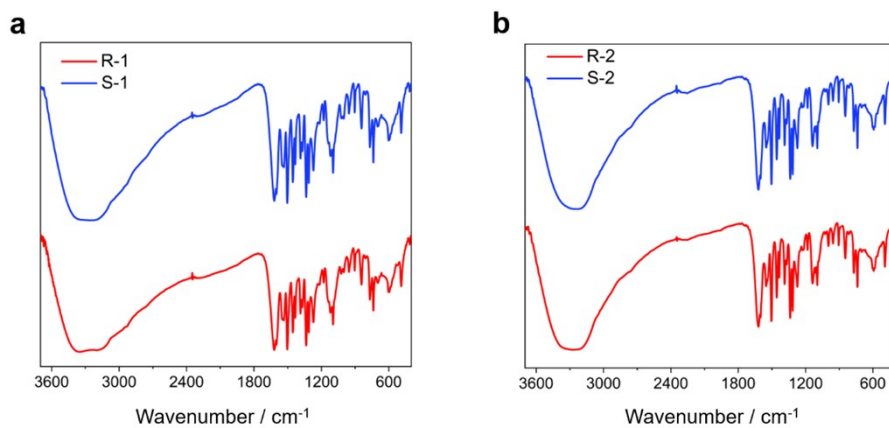

**Figure S1.** Infrared spectra (IR) of *R-1*, *S-1*, *R-2* and *S-2* (a, b).

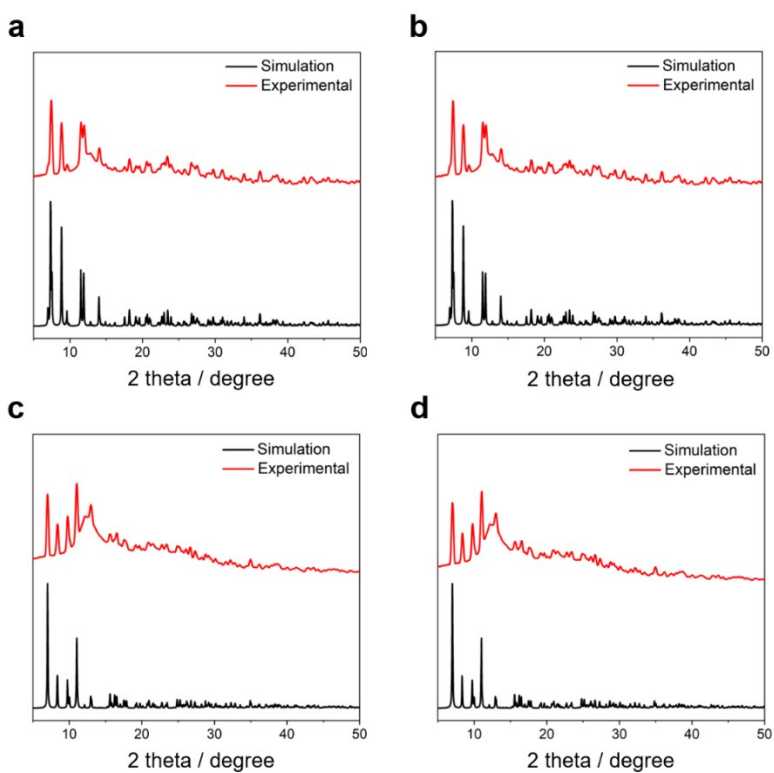

**Figure S2.** Powder diffraction pattern (PXRD) of *R-1*, *S-1*, *R-2* and *S-2* (a-d).

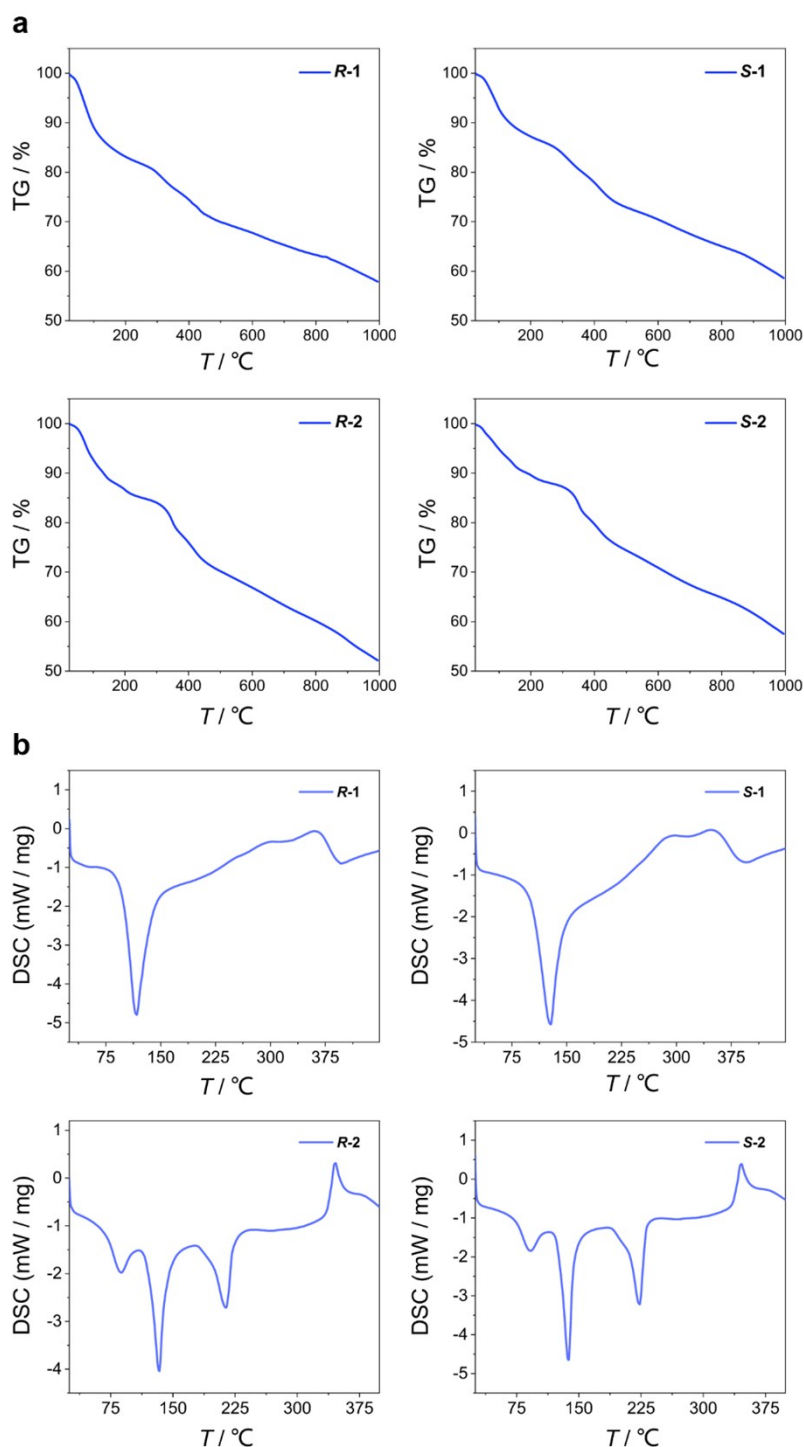

**Figure S3.** TG curve of *R-1*, *S-1*, *R-2* and *S-2* (a), DSC curve of *R-1*, *S-1*, *R-2* and *S-2* (b).

In order to explore the thermal stability of *R-1/S-1* and *R-2/S-2*, TG-DSC study was conducted. The thermal stability analysis of *R-1/S-1* and *R-2/S-2* was performed in a flowing  $N_2$  atmosphere while the temperature was slowly increased from 35 °C to 1,000 °C at a rate of 5 °C  $min^{-1}$ . The DSC test was also performed in a flowing  $N_2$  atmosphere, and the temperature was slowly increased from 35 °C to 450 °C at a rate of 5 °C  $min^{-1}$ . It can be seen from the TG-DSC curve that complex *R-1* has three

weight loss processes. First, in the temperature range of 35-200 °C, the weight loss rate of complex **R-1** is 16.37% (theoretical value is 16.33%), and a sharp exothermic peak is observed at 117.3 °C in the DSC curve, corresponding to the loss of four free CH<sub>3</sub>OH molecules, one free CH<sub>3</sub>CN molecule and two free H<sub>2</sub>O molecules. Secondly, as the temperature increases from 200 °C to 365 °C, the weight loss rate of complex **R-1** is 7.59% (theoretical value is 7.65%), and a weak exothermic peak is observed at 328.4 °C in the DSC curve, corresponding to the loss of three terminally coordinated CH<sub>3</sub>OH molecules. Finally, as the temperature increased from 365 °C to 600 °C, the sample mass decreased sharply, and an exothermic peak was observed at 394.1 °C in the DSC curve, which can be attributed to the degradation/combustion of the organic ligand part and the rapid decomposition of **R-1** to produce dysprosium(III) oxide (Figure S3a and S3b). Similarly, there are also three weight loss processes for **S-1**. First, in the temperature range of 35-270 °C, the weight loss rate of **S-1** is 15.31% (theoretical value is 15.42%), and a sharp exothermic peak is observed at 127.8 °C in the DSC curve, corresponding to the loss of six free CH<sub>3</sub>OH molecules. Secondly, as the temperature increases from 270 °C to 385 °C, the weight loss rate of complex **S-1** is 7.53% (theoretical value is 7.71%), and a weak exothermic peak is observed at 317.5 °C in the DSC curve, corresponding to the loss of three terminally coordinated CH<sub>3</sub>OH molecules. Finally, as the temperature increased from 385 °C to 600 °C, the sample mass decreased sharply, and an exothermic peak was observed at 400.9 °C in the DSC curve, which can be attributed to the degradation/combustion of the organic ligand part and the rapid decomposition of **S-1** to produce dysprosium(III) oxide (Figure S3a and S3b). Complex **R-2** has two weight loss processes. When the temperature gradually increases from 35 °C to 330 °C, the weight loss rate of complex **R-2** is 18.01% (theoretical value is 18.04%), and three obvious exothermic peaks were observed at 86.9 °C, 113.6 °C and 214.1 °C in the DSC curve, respectively. This process corresponds to the loss of four free CH<sub>3</sub>OH molecules, two terminally coordinated CH<sub>3</sub>OH molecule and one free H<sub>2</sub>O molecule. When the temperature exceeds 330 °C to 500 °C, the sample mass decreases sharply, and an obvious endothermic peak is observed at 350 °C in the DSC curve, which can be attributed to the degradation/combustion of the organic ligand part and the rapid decomposition of **R-2** to produce dysprosium(III) oxide (Figure S3a and S3b). Similarly, when the temperature gradually increases from 35 °C to 340 °C, the weight loss rate of **S-2** is 18.53% (theoretical value is 19.03%), and three obvious exothermic peaks were observed at 89.7 °C, 136.5 °C and 223.5 °C in the DSC curve, respectively. This process corresponds to the loss of two free CH<sub>3</sub>OH molecules and two

terminally coordinated  $\text{CH}_3\text{OH}$  molecules. When the temperature exceeds  $340\text{ }^\circ\text{C}$  to  $500\text{ }^\circ\text{C}$ , the sample mass decreases sharply, and an obvious endothermic peak is observed at  $360\text{ }^\circ\text{C}$  in the DSC curve, which can be attributed to the degradation/combustion of the organic ligand part and the rapid decomposition of **S-2** to produce dysprosium(III) oxide (Figure S3a and S3b).

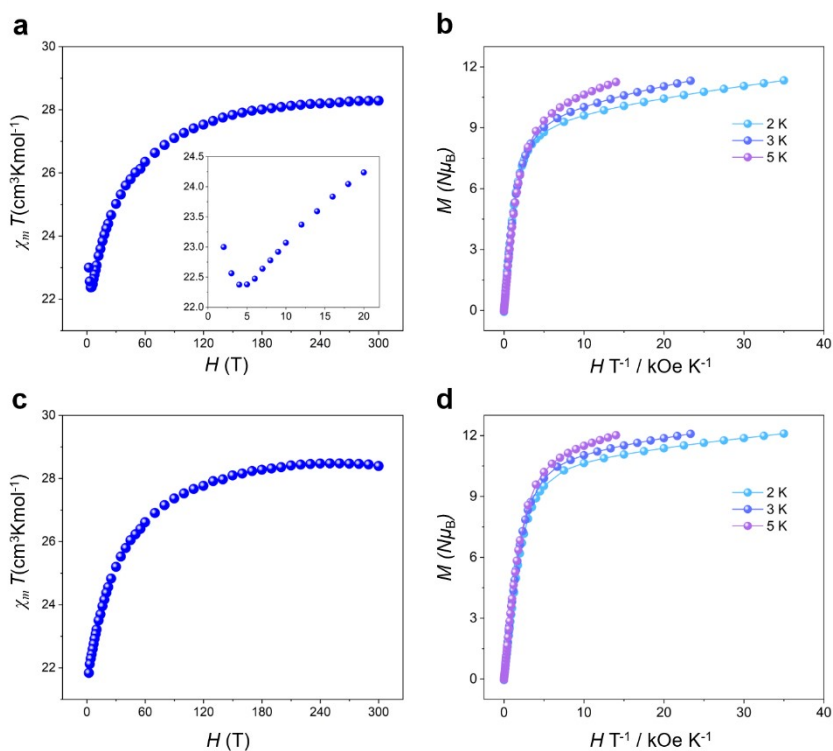

**Figure S4.** Temperature dependence of  $\chi_m T$  for **S-1** (a) and **S-2** (c);  $M$  vs.  $H/T$  plots of **S-1** (b) and **S-2** (d).



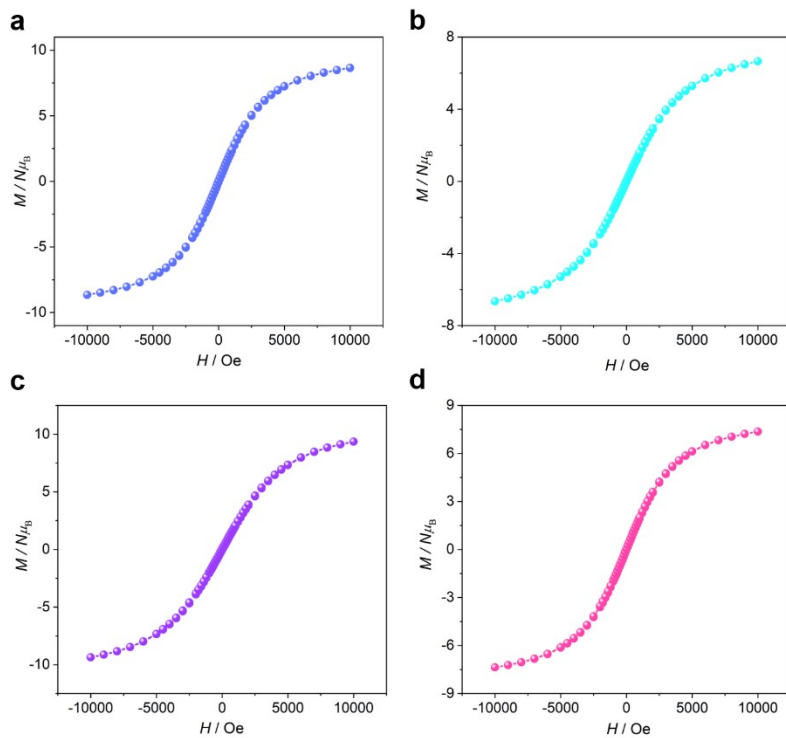

**Figure S5.** Loop curve graph of *R-1* (a), *S-1* (b), *R-2* (c) and *S-2* (d) at 2 K.

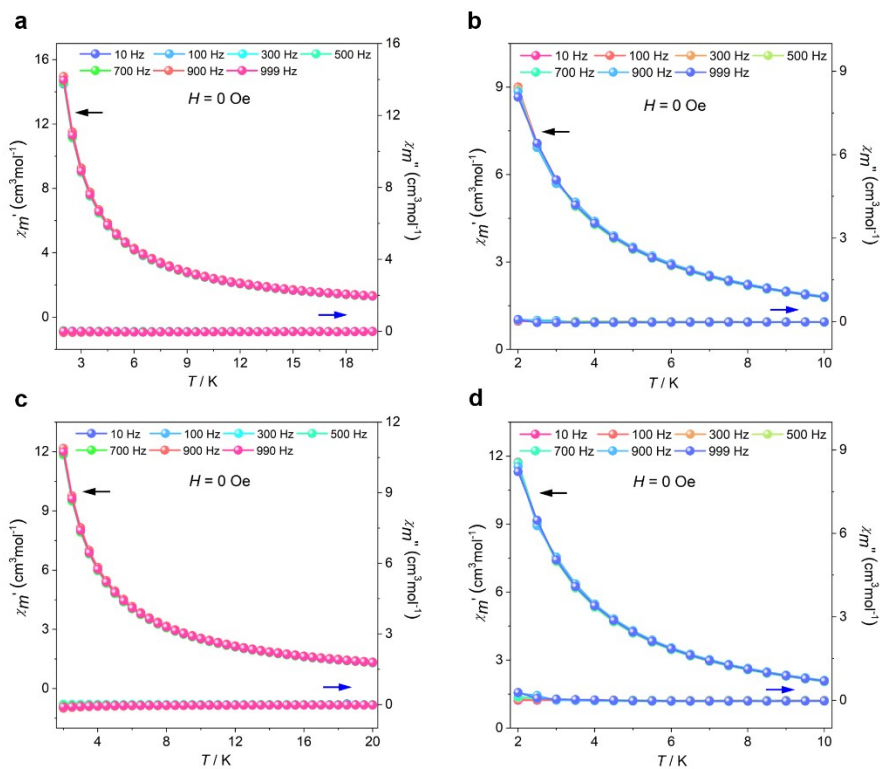

**Figure S6.** Temperature-dependent  $\chi'$  and  $\chi''$  AC susceptibilities under 0 Oe DC fields for *R-1*, *S-1*, *R-2* and *S-2* (a-d).

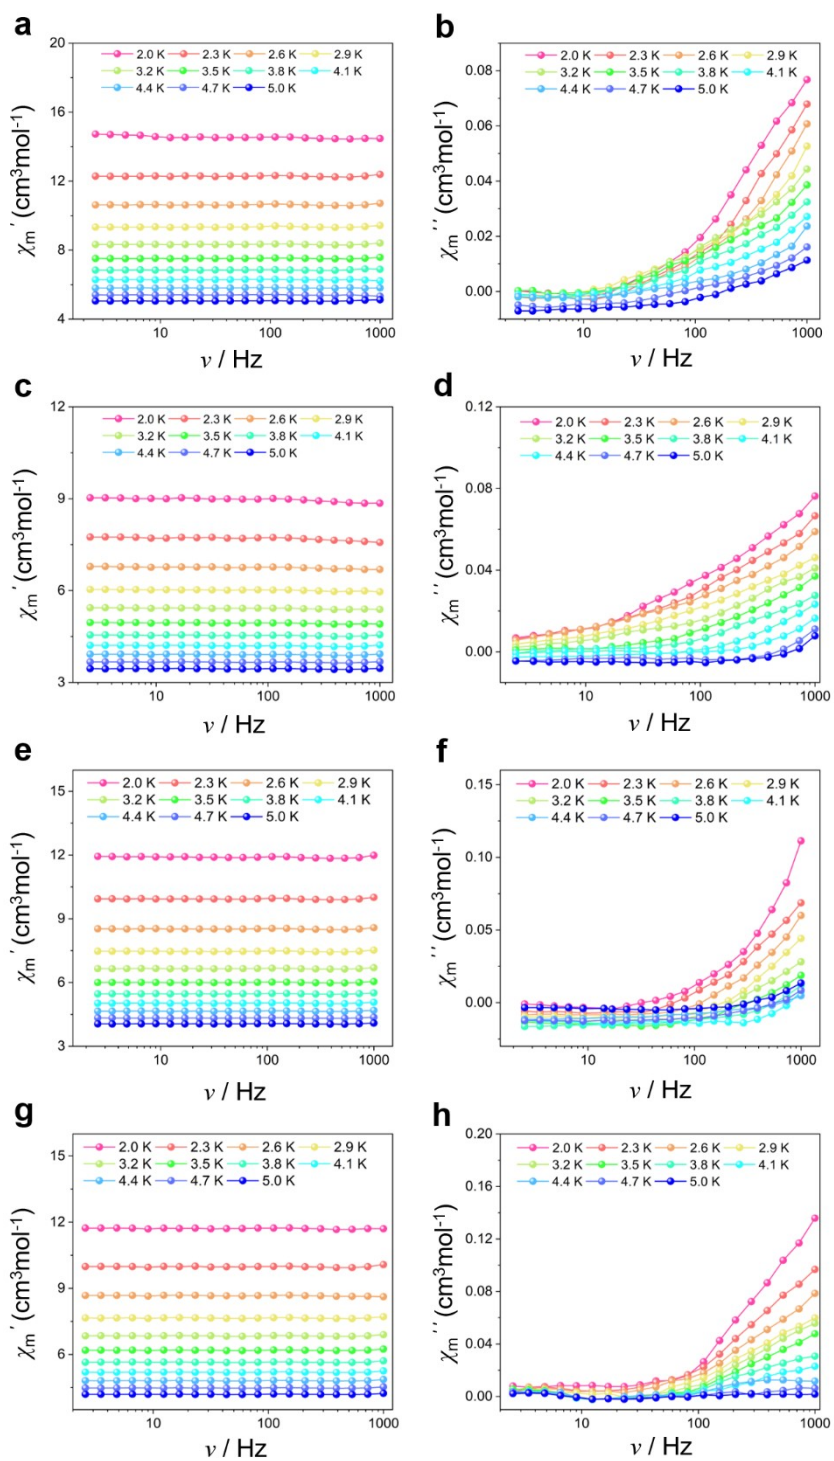

**Figure S7.** Frequency-dependence of the in-of-phase ( $\chi'$ ) and the out-of-phase ( $\chi''$ ) components under 0 Oe DC fields for *R-1*, *S-1*, *R-2* and *S-2* (a-h).

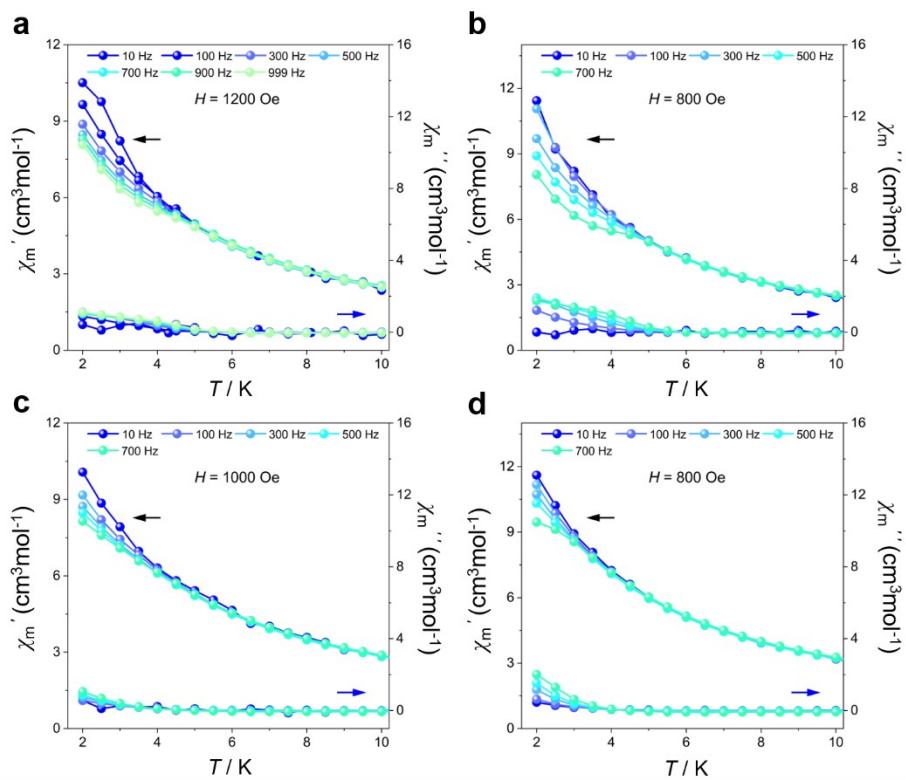

**Figure S8.** Temperature-dependent  $\chi'$  and  $\chi''$  AC susceptibilities under 1200 Oe DC fields for **R-1** (a), 800 Oe DC fields for **S-1** (b), 1000 Oe DC fields for **R-2** (c) and 800 Oe DC fields for **S-2** (d).

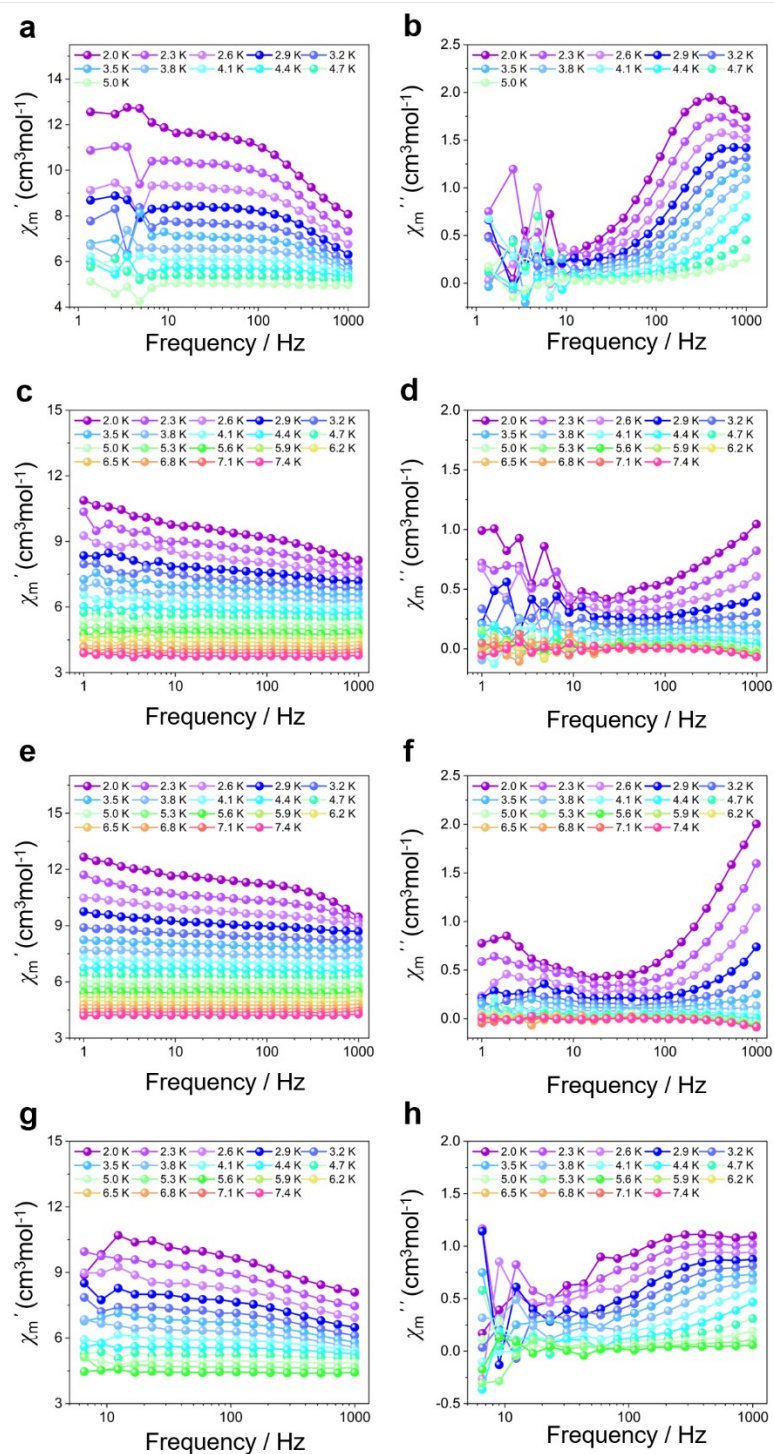

**Figure S9.** Frequency-dependence of the in-of-phase ( $\chi'$ ) and the out-of-phase ( $\chi''$ ) components under 1200 Oe DC fields for **R-1** (a and b), 800 Oe DC fields for **S-1** (c and d), 1000 Oe DC fields for **R-2** (e and f) and 800 Oe DC fields for **S-2** (g and h).

**Table S2.** Selected bond lengths (Å) and angles (°) of *R-1*.

| <b>Bond lengths (Å)</b> |          |                     |          |                     |          |
|-------------------------|----------|---------------------|----------|---------------------|----------|
| Dy1-Cl2                 | 2.671(2) | Dy1-N6              | 2.486(8) | Dy2-O1 <sup>i</sup> | 2.352(6) |
| Dy1-Cl1                 | 2.734(3) | Dy1-O7              | 2.427(7) | Dy2-N1 <sup>i</sup> | 2.475(8) |
| Dy1-O6                  | 2.333(6) | Dy2-Cl3             | 2.671(2) | Dy2-O9              | 2.339(8) |
| Dy1-O5                  | 2.421(6) | Dy2-O6              | 2.346(6) | Dy2-O8              | 2.396(7) |
| Dy1-O1 <sup>i</sup>     | 2.371(6) | Dy2-O2 <sup>i</sup> | 2.435(6) | Dy2-N2 <sup>i</sup> | 2.542(8) |
| Dy1-N5                  | 2.555(8) |                     |          |                     |          |

  

| <b>Bond angles (°)</b>   |            |                                      |            |                                      |          |
|--------------------------|------------|--------------------------------------|------------|--------------------------------------|----------|
| Cl2-Dy1-Cl1              | 150.31(8)  | N5-Dy1-Cl2                           | 74.6(2)    | O1 <sup>i</sup> -Dy2-O2 <sup>i</sup> | 164.6(2) |
| O6-Dy1-Cl2               | 96.43(18)  | N5-Dy1-Cl1                           | 80.2(2)    | O1 <sup>i</sup> -Dy2-N1 <sup>i</sup> | 66.5(2)  |
| O6-Dy1-Cl1               | 86.89(17)  | N6-Dy1-Cl2                           | 81.15(19)  | O1 <sup>i</sup> -Dy2-O8              | 89.6(3)  |
| O6-Dy1-O5                | 168.9(2)   | N6-Dy1-Cl1                           | 73.12(19)  | O1 <sup>i</sup> -Dy2-N2 <sup>i</sup> | 128.0(2) |
| O6-Dy1-O1 <sup>i</sup>   | 67.9(2)    | N6-Dy1-N5                            | 61.5(2)    | N1 <sup>i</sup> -Dy2-Cl3             | 87.8(2)  |
| O6-Dy1-N5                | 128.1(2)   | O7-Dy1-Cl2                           | 133.07(18) | N1 <sup>i</sup> -Dy2-N2 <sup>i</sup> | 61.7(2)  |
| O6-Dy1-N6                | 66.6(2)    | O7-Dy1-Cl1                           | 73.60(18)  | O9-Dy2-Cl3                           | 143.9(2) |
| O6-Dy1-O7                | 103.8(2)   | O7-Dy1-N5                            | 119.7(2)   | O9-Dy2-O6                            | 136.9(3) |
| O5-Dy1-Cl2               | 81.43(19)  | O7-Dy1-N6                            | 145.8(3)   | O9-Dy2-O2 <sup>i</sup>               | 82.1(3)  |
| O5-Dy1-Cl1               | 100.41(18) | O6-Dy2-Cl3                           | 79.03(18)  | O9-Dy2-O1 <sup>i</sup>               | 90.1(3)  |
| O5-Dy1-N5                | 62.1(2)    | O6-Dy2-O2 <sup>i</sup>               | 109.2(2)   | O9-Dy2-N1 <sup>i</sup>               | 74.4(3)  |
| O5-Dy1-N6                | 123.4(2)   | O6-Dy2-O1 <sup>i</sup>               | 68.0(2)    | O9-Dy2-O8                            | 74.1(3)  |
| O5-Dy1-O7                | 70.7(2)    | O6-Dy2-N1 <sup>i</sup>               | 123.3(2)   | O9-Dy2-N2 <sup>i</sup>               | 72.4(3)  |
| O1 <sup>i</sup> -Dy1-Cl2 | 76.82(18)  | O6-Dy2-O8                            | 69.3(3)    | O8-Dy2-Cl3                           | 131.7(2) |
| O1 <sup>i</sup> -Dy1-Cl1 | 130.74(18) | O6-Dy2-N2 <sup>i</sup>               | 150.1(3)   | O8-Dy2-O2 <sup>i</sup>               | 75.5(3)  |
| O1 <sup>i</sup> -Dy1-O5  | 101.0(2)   | O2 <sup>i</sup> -Dy2-Cl3             | 81.99(19)  | O8-Dy2-N1 <sup>i</sup>               | 140.1(3) |
| O1 <sup>i</sup> -Dy1-N5  | 148.5(3)   | O2 <sup>i</sup> -Dy2-N1 <sup>i</sup> | 123.2(2)   | O8-Dy2-N2 <sup>i</sup>               | 128.5(3) |
| O1 <sup>i</sup> -Dy1-N6  | 126.2(2)   | O2 <sup>i</sup> -Dy2-N2 <sup>i</sup> | 62.1(2)    | N2 <sup>i</sup> -Dy2-Cl3             | 71.5(2)  |
| O1 <sup>i</sup> -Dy1-O7  | 72.6(2)    | O1 <sup>i</sup> -Dy2-Cl3             | 111.55(18) |                                      |          |

**Table S3.** Selected bond lengths (Å) and angles (°) of **S-1**.

| <b>Bond lengths (Å)</b> |          |                     |          |                     |          |
|-------------------------|----------|---------------------|----------|---------------------|----------|
| Dy1-Cl1                 | 2.674(2) | Dy1-N5              | 2.555(7) | Dy2-O1 <sup>i</sup> | 2.346(5) |
| Dy1-Cl2                 | 2.735(3) | Dy1-N6              | 2.486(7) | Dy2-O9              | 2.351(7) |
| Dy1-O6                  | 2.337(5) | Dy2-Cl3             | 2.671(2) | Dy2-N1 <sup>i</sup> | 2.481(7) |
| Dy1-O5                  | 2.428(5) | Dy2-O6              | 2.337(5) | Dy2-O8              | 2.391(7) |
| Dy1-O1 <sup>i</sup>     | 2.380(5) | Dy2-O2 <sup>i</sup> | 2.445(6) | Dy2-N2 <sup>i</sup> | 2.537(7) |
| Dy1-O7                  | 2.426(6) |                     |          |                     |          |

  

| <b>Bond angles (°)</b>   |            |                                      |            |                                      |            |
|--------------------------|------------|--------------------------------------|------------|--------------------------------------|------------|
| Cl1-Dy1-Cl2              | 150.29(7)  | O7-Dy1-Cl2                           | 73.31(18)  | O1 <sup>i</sup> -Dy2-Cl3             | 111.47(16) |
| O6-Dy1-Cl1               | 96.26(16)  | O7-Dy1-O5                            | 70.9(2)    | O1 <sup>i</sup> -Dy2-O2 <sup>i</sup> | 164.7(2)   |
| O6-Dy1-Cl2               | 87.18(15)  | O7-Dy1-N5                            | 119.6(2)   | O1 <sup>i</sup> -Dy2-O9              | 90.0(2)    |
| O6-Dy1-O5                | 168.82(19) | O7-Dy1-N6                            | 145.5(2)   | O1 <sup>i</sup> -Dy2-N1 <sup>i</sup> | 66.0(2)    |
| O6-Dy1-O1 <sup>i</sup>   | 67.70(19)  | N5-Dy1-Cl1                           | 74.77(18)  | O1 <sup>i</sup> -Dy2-O8              | 89.9(2)    |
| O6-Dy1-O7                | 103.6(2)   | N5-Dy1-Cl2                           | 79.98(19)  | O1 <sup>i</sup> -Dy2-N2 <sup>i</sup> | 127.5(2)   |
| O6-Dy1-N5                | 128.3(2)   | N6-Dy1-Cl1                           | 81.10(18)  | O9-Dy2-Cl3                           | 144.08(18) |
| O6-Dy1-N6                | 66.8(2)    | N6-Dy1-Cl2                           | 73.16(18)  | O9-Dy2-O2 <sup>i</sup>               | 81.9(2)    |
| O5-Dy1-Cl1               | 81.55(16)  | N6-Dy1-N5                            | 61.5(2)    | O9-Dy2-N1 <sup>i</sup>               | 74.5(2)    |
| O5-Dy1-Cl2               | 100.19(16) | O6-Dy2-Cl3                           | 78.99(16)  | O9-Dy2-O8                            | 73.9(3)    |
| O5-Dy1-N5                | 61.9(2)    | O6-Dy2-O2 <sup>i</sup>               | 109.32(19) | O9-Dy2-N2 <sup>i</sup>               | 72.6(2)    |
| O5-Dy1-N6                | 123.3(2)   | O6-Dy2-O1 <sup>i</sup>               | 68.26(19)  | N1 <sup>i</sup> -Dy2-Cl3             | 88.02(18)  |
| O1 <sup>i</sup> -Dy1-Cl1 | 76.58(16)  | O6-Dy2-O9                            | 136.8(2)   | N1 <sup>i</sup> -Dy2-N2 <sup>i</sup> | 61.7(2)    |
| O1 <sup>i</sup> -Dy1-Cl2 | 131.01(16) | O6-Dy2-N1 <sup>i</sup>               | 123.2(2)   | O8-Dy2-Cl3                           | 131.72(19) |
| O1 <sup>i</sup> -Dy1-O5  | 101.16(19) | O6-Dy2-O8                            | 69.5(2)    | O8-Dy2-O2 <sup>i</sup>               | 75.3(2)    |
| O1 <sup>i</sup> -Dy1-O7  | 73.0(2)    | O6-Dy2-N2 <sup>i</sup>               | 150.1(2)   | O8-Dy2-N1 <sup>i</sup>               | 139.9(3)   |
| O1 <sup>i</sup> -Dy1-N5  | 148.5(2)   | O2 <sup>i</sup> -Dy2-Cl3             | 82.13(17)  | O8-Dy2-N2 <sup>i</sup>               | 128.5(2)   |
| O1 <sup>i</sup> -Dy1-N6  | 126.1(2)   | O2 <sup>i</sup> -Dy2-N1 <sup>i</sup> | 123.3(2)   | N2 <sup>i</sup> -Dy2-Cl3             | 71.50(17)  |
| O7-Dy1-Cl1               | 133.40(18) | O2 <sup>i</sup> -Dy2-N2 <sup>i</sup> | 62.3(2)    |                                      |            |

**Table S4.** Selected bond lengths (Å) and angles (°) of *R-2*.

| <b>Bond lengths (Å)</b>                |            |                                        |            |                                      |            |
|----------------------------------------|------------|----------------------------------------|------------|--------------------------------------|------------|
| Dy1-Cl1                                | 2.607(2)   | Dy1-N6 <sup>ii</sup>                   | 2.446(7)   | Dy2-O7                               | 2.369(6)   |
| Dy1-Cl2                                | 2.629(2)   | Dy1-N5 <sup>ii</sup>                   | 2.508(8)   | Dy2-N1 <sup>i</sup>                  | 2.496(7)   |
| Dy1-O1                                 | 2.291(6)   | Dy2-Cl3                                | 2.687(2)   | Dy2-O8                               | 2.383(8)   |
| Dy1-O5 <sup>ii</sup>                   | 2.411(7)   | Dy2-O1 <sup>i</sup>                    | 2.363(6)   | Dy2-N2 <sup>i</sup>                  | 2.538(7)   |
| Dy1-O6 <sup>ii</sup>                   | 2.338(6)   | Dy2-O2 <sup>i</sup>                    | 2.428(6)   | Dy2-O6                               | 2.341(6)   |
| <b>Bond angles (°)</b>                 |            |                                        |            |                                      |            |
| Cl1-Dy1-Cl2                            | 171.04(8)  | N6 <sup>ii</sup> -Dy1-Cl2              | 92.49(18)  | N1 <sup>i</sup> -Dy2-Cl3             | 74.13(16)  |
| O1-Dy1-Cl1                             | 88.24(16)  | N6 <sup>ii</sup> -Dy1-N5 <sup>ii</sup> | 62.7(3)    | N1 <sup>i</sup> -Dy2-N2 <sup>i</sup> | 61.6(2)    |
| O1-Dy1-Cl2                             | 92.32(16)  | N5 <sup>ii</sup> -Dy1-Cl1              | 82.6(2)    | O8-Dy2-Cl3                           | 76.5(2)    |
| O1-Dy1-O5 <sup>ii</sup>                | 97.8(2)    | N5 <sup>ii</sup> -Dy1-Cl2              | 93.9(2)    | O8-Dy2-O2 <sup>i</sup>               | 69.6(3)    |
| O1-Dy1-O6 <sup>ii</sup>                | 70.3(2)    | O1 <sup>i</sup> -Dy2-Cl3               | 83.86(15)  | O8-Dy2-N1 <sup>i</sup>               | 150.2(3)   |
| O1-Dy1-N6 <sup>ii</sup>                | 137.3(2)   | O1 <sup>i</sup> -Dy2-O2 <sup>i</sup>   | 167.5(2)   | O8-Dy2-N2 <sup>i</sup>               | 119.8(3)   |
| O1-Dy1-N5 <sup>ii</sup>                | 158.7(2)   | O1 <sup>i</sup> -Dy2-O7                | 94.2(2)    | N2 <sup>i</sup> -Dy2-Cl3             | 83.80(17)  |
| O5 <sup>ii</sup> -Dy1-Cl1              | 87.32(18)  | O1 <sup>i</sup> -Dy2-N1 <sup>i</sup>   | 66.2(2)    | O6-Dy2-O7                            | 75.3(2)    |
| O5 <sup>ii</sup> -Dy1-Cl2              | 83.74(18)  | O1 <sup>i</sup> -Dy2-O8                | 105.9(3)   | O6-Dy2-N1 <sup>i</sup>               | 124.6(2)   |
| O5 <sup>ii</sup> -Dy1-N6 <sup>ii</sup> | 124.9(2)   | O1 <sup>i</sup> -Dy2-N2 <sup>i</sup>   | 127.9(2)   | O6-Dy2-O8                            | 73.0(3)    |
| O5 <sup>ii</sup> -Dy1-N5 <sup>ii</sup> | 62.8(2)    | O2 <sup>i</sup> -Dy2-Cl3               | 105.82(16) | O6-Dy2-N2 <sup>i</sup>               | 145.0(2)   |
| O6 <sup>ii</sup> -Dy1-Cl1              | 100.38(18) | O2 <sup>i</sup> -Dy2-N1 <sup>i</sup>   | 123.5(2)   | O7-Dy2-Cl3                           | 149.33(18) |
| O6 <sup>ii</sup> -Dy1-Cl2              | 88.21(18)  | O2 <sup>i</sup> -Dy2-N2 <sup>i</sup>   | 62.3(2)    | O7-Dy2-O2 <sup>i</sup>               | 81.5(2)    |
| O6 <sup>ii</sup> -Dy1-O5 <sup>ii</sup> | 165.5(2)   | O6-Dy2-Cl3                             | 130.91(16) | O7-Dy2-N1 <sup>i</sup>               | 77.1(2)    |
| O6 <sup>ii</sup> -Dy1-N6 <sup>ii</sup> | 67.4(2)    | O6-Dy2-O1 <sup>i</sup>                 | 69.1(2)    | O7-Dy2-O8                            | 132.7(3)   |
| O6 <sup>ii</sup> -Dy1-N5 <sup>ii</sup> | 130.1(2)   | O6-Dy2-O2 <sup>i</sup>                 | 98.4(2)    | O7-Dy2-N2 <sup>i</sup>               | 73.2(2)    |
| N6 <sup>ii</sup> -Dy1-Cl1              | 93.16(18)  |                                        |            |                                      |            |

**Table S5.** Selected bond lengths (Å) and angles (°) of *S-2*.

| <b>Bond lengths (Å)</b> |          |                      |          |        |          |
|-------------------------|----------|----------------------|----------|--------|----------|
| Dy1-Cl2                 | 2.609(2) | Dy1-N6 <sup>ii</sup> | 2.442(7) | Dy2-O7 | 2.371(7) |

|                                        |           |                                        |            |                                      |            |
|----------------------------------------|-----------|----------------------------------------|------------|--------------------------------------|------------|
| Dy1-Cl1                                | 2.630(2)  | Dy1-N5 <sup>ii</sup>                   | 2.517(8)   | Dy2-O6                               | 2.347(6)   |
| Dy1-O5 <sup>ii</sup>                   | 2.415(6)  | Dy2-Cl3                                | 2.682(2)   | Dy2-N1 <sup>i</sup>                  | 2.499(7)   |
| Dy1-O1                                 | 2.292(5)  | Dy2-O1 <sup>i</sup>                    | 2.360(6)   | Dy2-N2 <sup>i</sup>                  | 2.542(7)   |
| Dy1-O6 <sup>ii</sup>                   | 2.347(6)  | Dy2-O2 <sup>i</sup>                    | 2.436(6)   | Dy2-O8                               | 2.391(7)   |
| <b>Bond angles (°)</b>                 |           |                                        |            |                                      |            |
| Cl2-Dy1-Cl1                            | 171.41(8) | N6 <sup>ii</sup> -Dy1-Cl1              | 92.93(17)  | O7-Dy2-N2 <sup>i</sup>               | 73.3(3)    |
| O5 <sup>ii</sup> -Dy1-Cl2              | 87.69(16) | N6 <sup>ii</sup> -Dy1-N5 <sup>ii</sup> | 62.6(2)    | O7-Dy2-O8                            | 132.6(2)   |
| O5 <sup>ii</sup> -Dy1-Cl1              | 83.76(16) | N5 <sup>ii</sup> -Dy1-Cl2              | 82.90(18)  | O6-Dy2-Cl3                           | 130.85(16) |
| O5 <sup>ii</sup> -Dy1-N6 <sup>ii</sup> | 125.1(2)  | N5 <sup>ii</sup> -Dy1-Cl1              | 93.93(19)  | O6-Dy2-O1 <sup>i</sup>               | 69.17(19)  |
| O5 <sup>ii</sup> -Dy1-N5 <sup>ii</sup> | 63.0(2)   | O1 <sup>i</sup> -Dy2-Cl3               | 84.05(15)  | O6-Dy2-O2 <sup>i</sup>               | 98.4(2)    |
| O1-Dy1-Cl2                             | 88.21(15) | O1 <sup>i</sup> -Dy2-O2 <sup>i</sup>   | 167.59(19) | O6-Dy2-O7                            | 75.2(2)    |
| O1-Dy1-Cl1                             | 92.09(15) | O1 <sup>i</sup> -Dy2-O7                | 94.0(2)    | O6-Dy2-N1 <sup>i</sup>               | 125.1(2)   |
| O1-Dy1-O5 <sup>ii</sup>                | 97.8(2)   | O1 <sup>i</sup> -Dy2-N1 <sup>i</sup>   | 66.6(2)    | O6-Dy2-N2 <sup>i</sup>               | 145.0(2)   |
| O1-Dy1-O6 <sup>ii</sup>                | 70.32(19) | O1 <sup>i</sup> -Dy2-N2 <sup>i</sup>   | 127.9(2)   | O6-Dy2-O8                            | 72.0(2)    |
| O1-Dy1-N6 <sup>ii</sup>                | 137.1(2)  | O1 <sup>i</sup> -Dy2-O8                | 104.9(2)   | N1 <sup>i</sup> -Dy2-Cl3             | 74.32(15)  |
| O1-Dy1-N5 <sup>ii</sup>                | 159.0(2)  | O2 <sup>i</sup> -Dy2-Cl3               | 105.46(15) | N1 <sup>i</sup> -Dy2-N2 <sup>i</sup> | 61.3(2)    |
| O6 <sup>ii</sup> -Dy1-Cl2              | 99.91(17) | O2 <sup>i</sup> -Dy2-N1 <sup>i</sup>   | 123.1(2)   | N2 <sup>i</sup> -Dy2-Cl3             | 83.92(16)  |
| O6 <sup>ii</sup> -Dy1-Cl1              | 88.26(18) | O2 <sup>i</sup> -Dy2-N2 <sup>i</sup>   | 62.2(2)    | O8-Dy2-Cl3                           | 76.55(18)  |
| O6 <sup>ii</sup> -Dy1-O5 <sup>ii</sup> | 165.4(2)  | O7-Dy2-Cl3                             | 149.53(18) | O8-Dy2-O2 <sup>i</sup>               | 70.5(2)    |
| O6 <sup>ii</sup> -Dy1-N6 <sup>ii</sup> | 67.3(2)   | O7-Dy2-O2 <sup>i</sup>                 | 81.8(2)    | O8-Dy2-N1 <sup>i</sup>               | 150.3(2)   |
| O6 <sup>ii</sup> -Dy1-N5 <sup>ii</sup> | 130.0(2)  | O7-Dy2-N1 <sup>i</sup>                 | 77.0(2)    | O8-Dy2-N2 <sup>i</sup>               | 121.0(3)   |
| N6 <sup>ii</sup> -Dy1-Cl2              | 92.69(17) |                                        |            |                                      |            |

**Table S6.** *SHAPE* analysis of the Dy(III) in *R-1*.

| Label  | Shape    | Symmetry                | Distortion (°) |
|--------|----------|-------------------------|----------------|
| OP-8   | $D_{8h}$ | Octagon                 | 34.487         |
| HPY-8  | $C_{7v}$ | Heptagonal pyramid      | 22.988         |
| HBPY-8 | $D_{6h}$ | Hexagonal bipyramid     | 8.288          |
| CU-8   | $O_h$    | Cube                    | 7.49           |
| SAPR-8 | $D_{4d}$ | Square antiprism        | 3.974          |
| TDD-8  | $D_{2d}$ | Triangular dodecahedron | 4.09           |



| JGBF-8       | $D_{2d}$     | Johnson-Gyrobifastigium (J26)                   | 8.617                         |
|--------------|--------------|-------------------------------------------------|-------------------------------|
| JETBPY-8     | $D_{3h}$     | Johnson-Elongated triangular bipyramid<br>(J14) | 26.801                        |
| JBTP-8       | $C_{2v}$     | Johnson-Biaugmented trigonal prism<br>(J50)     | 4.886                         |
| BTPR-8       | $C_{2v}$     | Biaugmen tedtrigonal prism                      | 3.962                         |
| JSD-8        | $D_{2d}$     | Snub disphenoid (J84)                           | 6.342                         |
| TT-8         | $T_d$        | Triakis tetrahedron                             | 8.314                         |
| ETBPY-8      | $D_{3h}$     | Elongated trigonal bipyramid                    | 22.458                        |
| <b>Label</b> | <b>Shape</b> | <b>Symmetry</b>                                 | <b>Distortion (°)<br/>Dy2</b> |
| OP-8         | $D_{8h}$     | Octagon                                         | 34.129                        |
| HPY-8        | $C_{7v}$     | Heptagonal pyramid                              | 21.436                        |
| HBPY-8       | $D_{6h}$     | Hexagonal bipyramid                             | 9.685                         |
| CU-8         | $O_h$        | Cube                                            | 9.303                         |
| SAPR-8       | $D_{4d}$     | Square antiprism                                | 4.745                         |
| TDD-8        | $D_{2d}$     | Triangular dodecahedron                         | 3.779                         |
| JGBF-8       | $D_{2d}$     | Johnson-Gyrobifastigium (J26)                   | 8.679                         |
| JETBPY-8     | $D_{3h}$     | Johnson-Elongated triangular bipyramid<br>(J14) | 25.067                        |
| JBTP-8       | $C_{2v}$     | Johnson-Biaugmented trigonal prism<br>(J50)     | 3.561                         |
| BTPR-8       | $C_{2v}$     | Biaugmen tedtrigonal prism                      | 2.850                         |
| JSD-8        | $D_{2d}$     | Snub disphenoid (J84)                           | 5.831                         |
| TT-8         | $T_d$        | Triakis tetrahedron                             | 9.698                         |
| ETBPY-8      | $D_{3h}$     | Elongated trigonal bipyramid                    | 21.770                        |

**Table S7.** SHAPE analysis of the Dy(III) in **S-1**.

| <b>Label</b> | <b>Shape</b> | <b>Symmetry</b>                                 | <b>Distortion (°)<br/>Dy1</b> |
|--------------|--------------|-------------------------------------------------|-------------------------------|
| OP-8         | $D_{8h}$     | Octagon                                         | 34.592                        |
| HPY-8        | $C_{7v}$     | Heptagonal pyramid                              | 23.059                        |
| HBPY-8       | $D_{6h}$     | Hexagonal bipyramid                             | 8.351                         |
| CU-8         | $O_h$        | Cube                                            | 7.512                         |
| SAPR-8       | $D_{4d}$     | Square antiprism                                | 3.967                         |
| TDD-8        | $D_{2d}$     | Triangular dodecahedron                         | 4.090                         |
| JGBF-8       | $D_{2d}$     | Johnson-Gyrobifastigium (J26)                   | 8.669                         |
| JETBPY-8     | $D_{3h}$     | Johnson-Elongated triangular bipyramid<br>(J14) | 26.819                        |
| JBTP-8       | $C_{2v}$     | Johnson-Biaugmented trigonal prism<br>(J50)     | 4.877                         |
| BTPR-8       | $C_{2v}$     | Biaugmen tedtrigonal prism                      | 3.966                         |
| JSD-8        | $D_{2d}$     | Snub disphenoid (J84)                           | 6.330                         |

| TT-8         | $T_d$        | Triakis tetrahedron                             | 8.316                               |
|--------------|--------------|-------------------------------------------------|-------------------------------------|
| ETBPY-8      | $D_{3h}$     | Elongated trigonal bipyramid                    | 22.525                              |
| <b>Label</b> | <b>Shape</b> | <b>Symmetry</b>                                 | <b>Distortion (°)</b><br><b>Dy2</b> |
| OP-8         | $D_{8h}$     | Octagon                                         | 34.243                              |
| HPY-8        | $C_{7v}$     | Heptagonal pyramid                              | 21.482                              |
| HBPY-8       | $D_{6h}$     | Hexagonal bipyramid                             | 9.683                               |
| CU-8         | $O_h$        | Cube                                            | 9.301                               |
| SAPR-8       | $D_{4d}$     | Square antiprism                                | 4.788                               |
| TDD-8        | $D_{2d}$     | Triangular dodecahedron                         | 3.784                               |
| JGBF-8       | $D_{2d}$     | Johnson-Gyrobifastigium (J26)                   | 8.676                               |
| JETBPY-8     | $D_{3h}$     | Johnson-Elongated triangular bipyramid<br>(J14) | 25.159                              |
| JBTP-8       | $C_{2v}$     | Johnson-Biaugmented trigonal prism<br>(J50)     | 3.610                               |
| BTPR-8       | $C_{2v}$     | Biaugmen tedtrigonal prism                      | 2.867                               |
| JSD-8        | $D_{2d}$     | Snub disphenoid (J84)                           | 5.869                               |
| TT-8         | $T_d$        | Triakis tetrahedron                             | 9.721                               |
| ETBPY-8      | $D_{3h}$     | Elongated trigonal bipyramid                    | 21.792                              |

**Table S8.** *SHAPE* analysis of the Dy(III) in *R-2*.

| <b>Label</b> | <b>Shape</b> | <b>Symmetry</b>                                 | <b>Distortion (°)</b><br><b>Dy1</b> |
|--------------|--------------|-------------------------------------------------|-------------------------------------|
| HP-7         | $D_{7h}$     | Heptagon                                        | 33.271                              |
| HPY-7        | $C_{6v}$     | Hexagonal pyramid                               | 21.157                              |
| PBPY-7       | $D_{5h}$     | Pentagonal bipyramid                            | 1.980                               |
| COC-7        | $C_{3v}$     | Capped octahedron                               | 7.541                               |
| CTPR-7       | $C_{2v}$     | Capped trigonal prism                           | 5.685                               |
| JPBPY-7      | $D_{5h}$     | Johnson pentagonal bipyramid (J13)              | 7.191                               |
| JETPY-7      | $C_{3v}$     | Elongated triangular pyramid (J7)               | 18.338                              |
| <b>Label</b> | <b>Shape</b> | <b>Symmetry</b>                                 | <b>Distortion (°)</b><br><b>Dy2</b> |
| OP-8         | $D_{8h}$     | Octagon                                         | 34.143                              |
| HPY-8        | $C_{7v}$     | Heptagonal pyramid                              | 21.865                              |
| HBPY-8       | $D_{6h}$     | Hexagonal bipyramid                             | 8.394                               |
| CU-8         | $O_h$        | Cube                                            | 7.344                               |
| SAPR-8       | $D_{4d}$     | Square antiprism                                | 3.883                               |
| TDD-8        | $D_{2d}$     | Triangular dodecahedron                         | 3.702                               |
| JGBF-8       | $D_{2d}$     | Johnson-Gyrobifastigium (J26)                   | 8.522                               |
| JETBPY-8     | $D_{3h}$     | Johnson-Elongated triangular bipyramid<br>(J14) | 27.074                              |
| JBTP-8       | $C_{2v}$     | Johnson-Biaugmented trigonal prism              | 4.241                               |

| (J50)   |          |                              |        |
|---------|----------|------------------------------|--------|
| BTPR-8  | $C_{2v}$ | Biaugmen tedtrigonal prism   | 3.428  |
| JSD-8   | $D_{2d}$ | Snub disphenoid (J84)        | 6.248  |
| TT-8    | $T_d$    | Triakis tetrahedron          | 7.859  |
| ETBPY-8 | $D_{3h}$ | Elongated trigonal bipyramid | 22.217 |

**Table S9.** *SHAPE* analysis of the Dy(III) in **S-2**.

| Label    | Shape    | Symmetry                                        | Distortion (°)<br>Dy1 |
|----------|----------|-------------------------------------------------|-----------------------|
| HP-7     | $D_{7h}$ | Heptagon                                        | 33.413                |
| HPY-7    | $C_{6v}$ | Hexagonal pyramid                               | 21.230                |
| PBPY-7   | $D_{5h}$ | Pentagonal bipyramid                            | 1.969                 |
| COC-7    | $C_{3v}$ | Capped octahedron                               | 7.650                 |
| CTPR-7   | $C_{2v}$ | Capped trigonal prism                           | 5.768                 |
| JPBPY-7  | $D_{5h}$ | Johnson pentagonal bipyramid (J13)              | 7.176                 |
| JETPY-7  | $C_{3v}$ | Elongated triangular pyramid (J7)               | 18.301                |
| Label    | Shape    | Symmetry                                        | Distortion (°)<br>Dy2 |
| OP-8     | $D_{8h}$ | Octagon                                         | 34.055                |
| HPY-8    | $C_{7v}$ | Heptagonal pyramid                              | 21.821                |
| HBPY-8   | $D_{6h}$ | Hexagonal bipyramid                             | 8.266                 |
| CU-8     | $O_h$    | Cube                                            | 7.332                 |
| SAPR-8   | $D_{4d}$ | Square antiprism                                | 3.953                 |
| TDD-8    | $D_{2d}$ | Triangular dodecahedron                         | 3.773                 |
| JGBF-8   | $D_{2d}$ | Johnson-Gyrobifastigium (J26)                   | 8.379                 |
| JETBPY-8 | $D_{3h}$ | Johnson-Elongated triangular bipyramid<br>(J14) | 26.975                |
| JBTP-8   | $C_{2v}$ | Johnson-Biaugmented trigonal prism<br>(J50)     | 4.246                 |
| BTPR-8   | $C_{2v}$ | Biaugmen tedtrigonal prism                      | 3.455                 |
| JSD-8    | $D_{2d}$ | Snub disphenoid (J84)                           | 6.167                 |
| TT-8     | $T_d$    | Triakis tetrahedron                             | 7.843                 |
| ETBPY-8  | $D_{3h}$ | Elongated trigonal bipyramid                    | 22.183                |

**Note 1**

SQUEEZE results for these four compounds are as follows:

**(1) R-1**

loop\_

\_platon\_squeeze\_void\_nr

```

_platon_squeeze_void_average_x
_platon_squeeze_void_average_y
_platon_squeeze_void_average_z
_platon_squeeze_void_volume
_platon_squeeze_void_count_electrons
_platon_squeeze_void_content
1 0.176 0.126 0.764 188 43 "
2 -0.179 0.626 0.735 184 43 "
3 0.324 0.874 0.264 188 43 "
4 0.679 0.373 0.235 184 43 "

```

That is, SQUEEZE gives 43 electrons/unit cell for the voids, and each formula unit has  $43/4 = 10.75$  electrons (since  $Z = 4$ ). It is well known that 1 H<sub>2</sub>O molecule contains 10 electrons, 1 CH<sub>3</sub>CN molecule contains 22 electrons, and a CH<sub>3</sub>OH molecule contains 18 electrons. Further combined with elemental analysis and thermogravimetric analysis results (Figure S3), the molecular formula of **R-1** is calculated to be: [Dy<sub>2</sub>(R-L<sup>1</sup>)(Cl)<sub>3</sub>(CH<sub>3</sub>OH)<sub>3</sub>]·Cl·4CH<sub>3</sub>OH·CH<sub>3</sub>CN·2H<sub>2</sub>O.

## (2) S-1

```

loop_
_platon_squeeze_void_nr
_platon_squeeze_void_average_x
_platon_squeeze_void_average_y
_platon_squeeze_void_average_z
_platon_squeeze_void_volume
_platon_squeeze_void_count_electrons
_platon_squeeze_void_content
1 -0.181 0.125 0.767 183 36 "
2 0.183 0.625 0.733 179 36 "
3 0.319 0.375 0.233 182 36 "
4 0.683 0.875 0.267 179 36 "

```

That is, SQUEEZE gives 36 electrons/unit cell for the voids, and each formula unit has  $36/4 = 9$

electrons (since  $Z = 4$ ). It is well known that 1  $\text{H}_2\text{O}$  molecule contains 10 electrons, 1  $\text{CH}_3\text{CN}$  molecule contains 22 electrons, and a  $\text{CH}_3\text{OH}$  molecule contains 18 electrons. Further combined with elemental analysis and thermogravimetric analysis results (Figure S3), the molecular formula of **R-1** is calculated to be:  $[\text{Dy}_2(\text{S-L}^1)(\text{Cl})_3(\text{CH}_3\text{OH})_3] \cdot \text{Cl} \cdot 6\text{CH}_3\text{OH}$ .

### (3) R-2

```
loop_  
_platon_squeeze_void_nr  
_platon_squeeze_void_average_x  
_platon_squeeze_void_average_y  
_platon_squeeze_void_average_z  
_platon_squeeze_void_volume  
_platon_squeeze_void_count_electrons  
_platon_squeeze_void_content  
1 -0.010 0.250 1.000 398 94 "  
2 -0.016 0.750 0.500 398 94 "
```

That is, SQUEEZE gives 94 electrons/unit cell for the voids, and each formula unit has  $94/4 = 23.5$  electrons (since  $Z = 4$ ). It is well known that 1  $\text{H}_2\text{O}$  molecule contains 10 electrons, 1  $\text{CH}_3\text{CN}$  molecule contains 22 electrons, and a  $\text{CH}_3\text{OH}$  molecule contains 18 electrons. Further combined with elemental analysis and thermogravimetric analysis results (Figure S3), the molecular formula of **R-2** is calculated to be:  $[\text{Dy}_2(\text{R-L}^1)(\text{Cl})_3(\text{CH}_3\text{OH})_2] \cdot \text{Cl} \cdot \text{H}_2\text{O} \cdot 4\text{CH}_3\text{OH}$ .

### (4) S-2

```
loop_  
_platon_squeeze_void_nr  
_platon_squeeze_void_average_x  
_platon_squeeze_void_average_y  
_platon_squeeze_void_average_z  
_platon_squeeze_void_volume  
_platon_squeeze_void_count_electrons
```

\_platon\_squeeze\_void\_content

1 -0.028 0.250 0.500 376 115 "

2 -0.005 0.750 0.000 376 115 "

That is, SQUEEZE gives 115 electrons/unit cell for the voids, and each formula unit has  $115/4 = 28.75$  electrons (since  $Z = 4$ ). It is well known that 1 H<sub>2</sub>O molecule contains 10 electrons, 1 CH<sub>3</sub>CN molecule contains 22 electrons, and a CH<sub>3</sub>OH molecule contains 18 electrons. Further combined with elemental analysis and thermogravimetric analysis results (Figure S3), the molecular formula of **S-2** is calculated to be: [Dy<sub>2</sub>(S-L<sup>1</sup>)(Cl)<sub>3</sub>(CH<sub>3</sub>OH)<sub>2</sub>].Cl·5CH<sub>3</sub>OH.
